# Supplementary material for: Differences and relationship in functional movement screen (FMS™) scores and physical fitness in males and female semi-professional soccer players
Source: PeerJ. 2023 Dec 13;11:e16649. doi: 10.7717/peerj.16649 (PMC10725178; doi:10.7717/peerj.16649)
Supplement: Supplemental Information 1 [file peerj-11-16649-s001.xlsx]

## Sheet: Hoja1
Women Soccer Players	Age (yrs)	Height	Weight	BMI	YYT IR1	VO2max	5-0-5	10m	FMS
Women soccer player 1	21	166	70.9	25.7	1480	48.832	2.8	2.06	16
Women soccer player 2	20	153.5	62.8	26.5	640	41.776	2.84	1.98	13
Women soccer player 3	25	160.4	56.7	22.1	1640	50.176	2.821	1.848	10
Women soccer player 4	21	171.9	73.5	25.1	1340	47.656	2.58	1.83	20
Women soccer player 5	18	174.3	59	19.5	1680	50.512	2.561	1.865	17
Women soccer player 6	19	166.7	55.6	19.9	1880	52.192	2.667	1.843	19
Women soccer player 7	22	163	58.3	22	1480	48.832	2.611	1.923	17
Women soccer player 8	21	168.8	66.2	23.2	1560	49.504	2.575	1.865	14
Women soccer player 9	23	179	69.2	21.6	1800	51.52	2.816	1.756	16
Women soccer player 10	18	165	64.6	23.5	1240	46.816	2.79	1.87	17
Women soccer player 11	19	175.3	66.8	21.8	1640	50.176	2.49	1.85	16
Women soccer player 12	19	150	62.8	27.9	840	43.456	2.56	1.85	17
Women soccer player 13	21	163.6	55.2	20.5	1360	47.824	3.13	2.15	15
Women soccer player 14	22	169.4	66.5	23	1360	47.824	2.56	1.85	15
Women Soccer Players	Age (yrs)	Height	Weight	BMI	YYT IR1	VO2max	5-0-5	10m	FMS
Mean	20.6429	166.207	63.4357	23.0214	1424.29	48.364	2.70007	1.89571	15.8571
Standard Deviation	1.98483	8.02807	5.82694	2.50482	343.93	2.88901	0.173727	0.102736	2.47626
Sample Variance	3.93956	64.4499	33.9532	6.27412	118288	8.3464	0.030181	0.0105547	6.13187
Range	7	29	18.3	8.4	1240	10.416	0.64	0.394	10
Maximum	25	179	73.5	27.9	1880	52.192	3.13	2.15	20
Minimum	18	150	55.2	19.5	640	41.776	2.49	1.756	10
Male Soccer players	Age (yrs)	Height	Weight	BMI	YYT IR1	VO2max	5-0-5	10m	FMS
Male soccer player 1	22	177	62.5	19.5806	1120	45.808	2.45	1.64	15
Male soccer player 2	19	177	69.7	21.8363	1480	48.832	2.67	1.83	13
Male soccer player 3	21	175	79	24.1938	1660	50.344	2.77	1.92	15
Male soccer player 4	23	162	63.8	16.7437	1640	50.176	2.21	1.6	18
Male soccer player 5	19	177	76.2	23.8727	1560	49.504	2.64	1.83	16
Male soccer player 6	22	167	77.2	21.5303	1980	53.032	2.29	1.81	19
Male soccer player 7	22	179	74.7	23.9346	1440	48.496	2.41	1.83	16
Male soccer player 8	23	168	70	19.7568	2240	55.216	2.62	1.88	17
Male soccer player 9	19	168	71.1	20.0673	1900	52.36	2.34	1.64	17
Male soccer player 10	20	174	75.7	22.9189	1640	50.176	2.54	1.8	14
Male soccer player 11	22	168	66.6	18.7972	2120	54.208	2.57	1.81	16
Male soccer player 12	22	165	71	19.3298	1980	53.032	2.41	1.62	17
Male soccer player 13	24	175	66.7	20.4269	1860	52.024	2.81	1.88	17
Male soccer player 14	20	174	65	19.6794	1920	52.528	2.23	1.73	18
Male Soccer players	Age (yrs)	Height	Weight	BMI	YYT IR1	VO2max	5-0-5	10m	FMS
Mean	21.2857	171.857	70.6571	20.9049	1752.86	51.124	2.49714	1.77286	16.2857
Standard Deviation	1.63747	5.34728	5.29335	2.2164	301.341	2.53127	0.19289	0.106802	1.63747
Sample Variance	2.68132	28.5934	28.0196	4.91245	90806.6	6.40731	0.0372066	0.0114066	2.68132
Range	5	17	16.5	7.45008	1120	9.408	0.6	0.32	6
Maximum	24	179	79	24.1938	2240	55.216	2.81	1.92	19
Minimum	19	162	62.5	16.7437	1120	45.808	2.21	1.6	13
